# Supplementary material for: Barriers and facilitators to answering clinical questions in the Americas: a cross-sectional study of surgical trauma care providers
Source: HighWire-hosted journal article supplement (doi:10.1136/tsaco-2021-000774), 2021-10-01
Supplement: tsaco-2021-000774supp001_data_supplement.pdf [file tsaco-2021-000774supp001_data_supplement.pdf]

| record_id | evidence_based_language | country | zone | hospital_type | number_patients | beds | service | age |   |
|-----------|-------------------------|---------|------|---------------|-----------------|------|---------|-----|---|
| 2         | 3/31/20 6:41            | 1       | 19   | 3             | 2               | 1    | 3       | 2   | 4 |
| 3         | 3/31/20 6:47            | 1       | 19   | 3             | 1               | 2    | 3       | 4   | 3 |
| 4         | 3/31/20 6:49            | 1       | 3    | 3             | 1               | 1    | 2       | 1   | 2 |
| 5         | 3/31/20 6:49            | 1       | 3    | 3             | 1               | 1    | 2       | 2   | 1 |
| 6         | 3/31/20 7:27            | 1       | 3    | 3             | 1               | 1    | 3       | 1   | 4 |
| 7         | 3/31/20 7:28            | 1       | 19   | 3             | 1               | 4    | 4       | 2   | 2 |
| 8         | 3/31/20 7:29            | 1       | 19   | 3             | 1               | 2    | 4       | 1   | 2 |
| 9         | 3/31/20 8:19            | 1       | 19   | 3             | 1               | 2    | 4       | 2   | 3 |
| 10        | 3/31/20 8:51            | 1       | 10   | 3             | 1               | 3    | 3       | 1   | 2 |
| 11        | 3/31/20 9:47            | 1       | 19   | 3             | 1               | 2    | 4       | 2   | 3 |
| 12        | 4/2/20 18:36            | 1       | 10   | 3             | 1               | 2    | 4       | 1   | 4 |
| 13        | 4/9/20 13:21            | 1       | 19   | 2             | 2               | 2    | 4       | 4   | 3 |
| 14        | 4/9/20 13:25            | 1       | 10   | 1             | 3               | 1    | 3       | 4   | 3 |
| 15        | 4/9/20 13:36            | 1       | 5    | 3             | 1               | 4    | 3       | 3   | 3 |
| 16        | 4/9/20 13:43            | 1       | 3    | 3             | 1               | 2    | 2       | 1   | 2 |
| 17        | 4/9/20 13:54            | 1       | 19   | 1             | 1               | 2    | 4       | 3   | 3 |
| 18        | 4/9/20 14:03            | 1       | 3    | 3             | 1               | 1    | 3       | 2   | 3 |
| 19        | 4/9/20 14:43            | 1       | 1    | 3             | 1               | 2    | 3       | 2   | 4 |
| 20        | 4/10/20 4:20            | 1       | 19   | 3             | 1               | 4    | 4       | 2   | 4 |
| 21        | 4/10/20 16:13           | 1       | 9    | 3             | 1               | 1    | 2       | 1   | 1 |
| 22        | 4/10/20 17:31           | 1       | 19   | 3             | 1               | 1    | 4       | 2   | 2 |
| 23        | 4/11/20 4:09            | 1       | 21   | 3             | 1               | 4    | 4       | 1   | 4 |
| 24        | 4/12/20 7:10            | 1       | 5    | 3             | 2               | 4    | 4       | 1   | 3 |
| 25        | 4/12/20 10:14           | 1       | 18   | 3             | 1               | 1    | 4       | 4   | 4 |
| 26        | 4/12/20 18:24           | 1       | 19   | 3             | 1               | 1    | 4       | 2   | 4 |
| 27        | 4/13/20 4:38            | 1       | 16   | 3             | 1               | 1    | 4       | 2   | 3 |
| 28        | 4/14/20 11:26           | 1       | 3    | 3             | 1               | 1    | 2       | 1   | 3 |
| 1         | 3/31/20 5:57            | 2       | 1    | 3             | 1               | 1    | 3       | 1   | 3 |
| 2         | 3/31/20 6:02            | 2       | 15   | 3             | 1               | 4    | 4       | 4   | 1 |
| 3         | 3/31/20 6:02            | 2       | 13   | 3             | 1               | 1    | 4       | 1   | 3 |

|    |               |   |    |   |   |   |   |   |   |
|----|---------------|---|----|---|---|---|---|---|---|
| 4  | 3/31/20 6:09  | 2 | 14 | 3 | 1 | 4 | 4 | 2 | 4 |
| 5  | 3/31/20 6:12  | 2 | 11 | 3 | 1 | 1 | 3 | 4 | 3 |
| 6  | 3/31/20 6:15  | 2 | 6  | 1 | 1 | 1 | 2 | 1 | 2 |
| 7  | 3/31/20 6:21  | 2 | 13 | 3 | 1 | 1 | 4 | 4 | 2 |
| 8  | 3/31/20 6:25  | 2 | 9  | 3 | 1 | 1 | 2 | 1 | 1 |
| 9  | 3/31/20 6:25  | 2 | 1  | 3 | 1 | 1 | 1 | 1 | 2 |
| 10 | 3/31/20 6:44  | 2 | 15 | 3 | 1 | 4 | 3 | 1 | 3 |
| 11 | 3/31/20 6:41  | 2 | 4  | 3 | 1 | 2 | 2 | 1 | 3 |
| 12 | 3/31/20 7:29  | 2 | 2  | 3 | 1 | 1 | 3 | 1 | 3 |
| 13 | 3/31/20 7:29  | 2 | 2  | 3 | 1 | 1 | 3 | 1 | 3 |
| 14 | 3/31/20 7:40  | 2 | 5  | 3 | 2 | 4 | 2 | 2 | 2 |
| 15 | 3/31/20 7:40  | 2 | 5  | 3 | 1 | 4 | 4 | 2 | 3 |
| 16 | 3/31/20 8:01  | 2 | 2  | 3 | 2 | 1 | 2 | 1 | 3 |
| 17 | 3/31/20 8:32  | 2 | 11 | 3 | 1 | 4 | 2 | 1 | 3 |
| 18 | 3/31/20 8:35  | 2 | 1  | 3 | 1 | 1 | 1 | 1 | 3 |
| 19 | 3/31/20 10:53 | 2 | 14 | 3 | 1 | 2 | 1 | 1 | 3 |
| 20 | 3/31/20 12:55 | 2 | 9  | 3 | 1 | 4 | 5 | 2 | 2 |
| 21 | 3/31/20 15:09 | 2 | 8  | 3 | 1 | 4 | 1 | 3 | 3 |
| 22 | 4/1/20 6:41   | 2 | 15 | 3 | 1 | 1 | 4 | 1 | 3 |
| 23 | 4/1/20 11:07  | 2 | 11 | 3 | 1 | 1 | 3 | 4 | 3 |
| 24 | 4/1/20 16:10  | 2 | 15 | 3 | 1 | 4 | 2 | 2 | 3 |
| 25 | 4/1/20 17:59  | 2 | 11 | 3 | 2 | 1 | 2 | 1 | 4 |
| 26 | 4/1/20 19:04  | 2 | 11 | 3 | 2 | 2 | 2 | 1 | 3 |
| 27 | 4/1/20 20:04  | 2 | 11 | 3 | 1 | 4 | 1 | 1 | 3 |
| 28 | 4/1/20 21:26  | 2 | 11 | 3 | 1 | 2 | 2 | 1 | 2 |
| 29 | 4/2/20 9:02   | 2 | 11 | 3 | 2 | 3 | 2 | 4 | 3 |
| 30 | 4/2/20 10:53  | 2 | 11 | 3 | 2 | 4 | 2 | 1 | 4 |
| 31 | 4/2/20 12:20  | 2 | 13 | 3 | 1 | 2 | 4 | 4 | 3 |
| 32 | 4/2/20 16:48  | 2 | 11 | 3 | 2 | 1 | 5 | 1 | 3 |
| 34 | 4/2/20 21:13  | 2 | 1  | 3 | 1 | 1 | 2 | 1 | 2 |
| 35 | 4/6/20 0:15   | 2 | 11 | 3 | 1 | 1 | 2 | 1 | 4 |

|    |               |   |    |   |   |   |   |   |   |
|----|---------------|---|----|---|---|---|---|---|---|
| 36 | 4/6/20 0:15   | 2 | 11 | 3 | 1 | 1 | 2 | 1 | 4 |
| 37 | 4/9/20 13:28  | 2 | 5  | 3 | 2 | 4 | 3 | 3 | 2 |
| 38 | 4/9/20 13:38  | 2 | 10 | 3 | 1 | 2 | 1 | 1 | 2 |
| 39 | 4/9/20 13:46  | 2 | 11 | 3 | 2 | 1 | 1 | 1 | 4 |
| 40 | 4/9/20 13:49  | 2 | 11 | 3 | 1 | 1 | 2 | 1 | 2 |
| 42 | 4/9/20 14:01  | 2 | 14 | 3 | 1 | 2 | 3 | 2 | 2 |
| 43 | 4/9/20 14:07  | 2 | 5  | 3 | 1 | 2 | 2 | 2 | 3 |
| 44 | 4/9/20 14:08  | 2 | 5  | 3 | 2 | 1 | 2 | 1 | 2 |
| 45 | 4/9/20 14:40  | 2 | 17 | 2 | 1 | 2 | 4 | 1 | 1 |
| 46 | 4/9/20 14:46  | 2 | 4  | 3 | 1 | 4 | 3 | 1 | 4 |
| 47 | 4/9/20 15:04  | 2 | 2  | 3 | 1 | 3 | 3 | 1 | 2 |
| 48 | 4/9/20 15:15  | 2 | 1  | 3 | 1 | 4 | 2 | 2 | 3 |
| 49 | 4/9/20 15:21  | 2 | 5  | 3 | 1 | 4 | 4 | 1 | 3 |
| 50 | 4/9/20 15:31  | 2 | 9  | 3 | 1 | 2 | 1 | 2 | 3 |
| 51 | 4/9/20 15:55  | 2 | 5  | 3 | 2 | 4 | 3 | 1 | 4 |
| 52 | 4/9/20 16:27  | 2 | 12 | 3 | 2 | 2 | 1 | 4 | 3 |
| 53 | 4/9/20 16:36  | 2 | 21 | 3 | 1 | 3 | 2 | 2 | 2 |
| 54 | 4/9/20 16:50  | 2 | 11 | 3 | 2 | 1 | 1 | 1 | 4 |
| 55 | 4/9/20 17:11  | 2 | 15 | 3 | 1 | 3 | 1 | 1 | 1 |
| 56 | 4/9/20 17:39  | 2 | 21 | 3 | 2 | 2 | 1 | 3 | 4 |
| 57 | 4/9/20 18:33  | 2 | 5  | 3 | 2 | 4 | 1 | 1 | 2 |
| 58 | 4/9/20 18:54  | 2 | 6  | 3 | 1 | 1 | 4 | 1 | 3 |
| 59 | 4/9/20 18:59  | 2 | 10 | 3 | 3 | 2 | 3 | 1 | 2 |
| 60 | 4/9/20 19:40  | 2 | 7  | 3 | 1 | 4 | 4 | 3 | 1 |
| 61 | 4/10/20 1:56  | 2 | 5  | 3 | 2 | 4 | 5 | 1 | 2 |
| 62 | 4/10/20 4:02  | 2 | 5  | 3 | 1 | 4 | 3 | 1 | 1 |
| 63 | 4/10/20 5:00  | 2 | 9  | 3 | 2 | 2 | 2 | 1 | 2 |
| 64 | 4/10/20 7:27  | 2 | 11 | 3 | 1 | 1 | 3 | 4 | 3 |
| 65 | 4/10/20 7:47  | 2 | 20 | 1 | 2 | 4 | 3 | 1 | 4 |
| 66 | 4/10/20 17:09 | 2 | 20 | 3 | 1 | 1 | 4 | 1 | 3 |
| 67 | 4/10/20 18:38 | 2 | 12 | 3 | 1 | 2 | 1 | 4 | 2 |

|    |               |   |    |   |   |   |   |   |   |
|----|---------------|---|----|---|---|---|---|---|---|
| 68 | 4/10/20 23:44 | 2 | 15 | 3 | 1 | 1 | 3 | 1 | 4 |
| 69 | 4/11/20 3:56  | 2 | 2  | 3 | 3 | 3 | 3 | 1 | 3 |
| 70 | 4/11/20 4:15  | 2 | 21 | 3 | 1 | 4 | 4 | 1 | 4 |
| 71 | 4/11/20 8:23  | 2 | 11 | 3 | 2 | 1 | 1 | 1 | 3 |
| 72 | 4/12/20 10:04 | 2 | 14 | 3 | 1 | 2 | 3 | 2 | 2 |
| 73 | 4/13/20 13:16 | 2 | 14 | 3 | 1 | 4 | 3 | 2 | 2 |
| 74 | 4/13/20 13:22 | 2 | 1  | 3 | 1 | 1 | 2 | 1 | 3 |
| 75 | 4/13/20 13:32 | 2 | 1  | 3 | 1 | 1 | 4 | 3 | 3 |
| 76 | 4/16/20 6:36  | 2 | 15 | 3 | 1 | 4 | 2 | 1 | 3 |
| 77 | 4/20/20 8:41  | 2 | 9  | 3 | 1 | 4 | 3 | 1 | 3 |
| 1  | 3/31/20 7:08  | 3 | 3  | 3 | 1 | 4 | 4 | 2 | 2 |
| 2  | 3/31/20 9:16  | 3 | 3  | 3 | 1 | 1 | 3 | 2 | 4 |
| 3  | 3/31/20 12:47 | 3 | 3  | 3 | 3 | 1 | 3 | 1 | 4 |
| 4  | 4/9/20 15:47  | 3 | 3  | 3 | 1 | 1 | 4 | 1 | 4 |
| 5  | 4/10/20 10:20 | 3 | 3  | 3 | 1 | 1 | 3 | 1 | 4 |
| 6  | 4/10/20 14:06 | 3 | 3  | 3 | 1 | 1 | 4 | 2 | 3 |

| years_practi | english | eng_neg_im | google_trans | understand_ | colleagues_f | unnecessary | translate_otl | translation_c | doubts |
|--------------|---------|------------|--------------|-------------|--------------|-------------|---------------|---------------|--------|
| 5            | 5       | 5          | 0            | 1           | 0            | 0           | 0             | 1             | 1      |
| 4            | 5       | 5          | 0            | 0           | 0            | 1           | 0             | 1             | 4      |
| 3            | 4       | 5          | 0            | 1           | 0            | 0           | 0             | 1             | 3      |
| 2            | 1       | 3          | 1            | 0           | 0            | 0           | 0             | 2             | 4      |
| 5            | 4       | 4          | 1            | 1           | 0            | 0           | 0             | 2             | 2      |
| 3            | 5       | 5          | 0            | 1           | 0            | 0           | 0             | 1             | 5      |
| 2            | 5       | 5          | 1            | 1           | 0            | 0           | 0             | 1             | 4      |
| 4            | 5       | 5          | 0            | 1           | 0            | 0           | 0             | 1             | 4      |
| 3            | 3       | 4          | 1            | 0           | 0            | 0           | 0             | 2             | 3      |
| 4            | 4       | 5          | 0            | 1           | 0            | 0           | 0             | 1             | 4      |
| 5            | 5       | 5          | 0            | 0           | 0            | 0           | 0             | 1             | 5      |
| 3            | 5       | 5          | 0            | 1           | 0            | 0           | 0             | 1             | 5      |
| 5            | 4       | 2          | 0            | 1           | 0            | 0           | 0             | 2             | 3      |
| 4            | 4       | 5          | 0            | 1           | 0            | 0           | 0             | 1             | 2      |
| 3            | 4       | 5          | 1            | 1           | 0            | 0           | 0             | 2             | 3      |
| 5            | 5       | 5          | 0            | 0           | 0            | 1           | 0             | 1             | 4      |
| 4            | 5       | 5          | 0            | 0           | 0            | 1           | 0             | 1             | 5      |
| 5            | 4       | 5          | 0            | 1           | 0            | 0           | 1             | 2             | 3      |
| 5            | 5       | 5          | 0            | 0           | 0            | 1           | 0             | 1             | 2      |
| 2            | 4       | 1          | 0            | 0           | 0            | 1           | 0             | 2             | 2      |
| 2            | 5       | 5          | 0            | 0           | 0            | 1           | 0             | 3             | 5      |
| 4            | 4       | 2          | 0            | 1           | 0            | 0           | 0             | 2             | 3      |
| 4            | 4       | 5          | 0            | 1           | 0            | 0           | 0             | 3             | 3      |
| 5            | 4       | 5          | 0            | 0           | 0            | 1           | 0             | 1             | 4      |
| 5            | 5       | 3          | 0            | 1           | 0            | 0           | 0             | 1             | 3      |
| 5            | 4       | 5          | 0            | 1           | 0            | 0           | 0             | 1             | 2      |
| 3            | 4       | 4          | 1            | 0           | 0            | 0           | 0             | 1             | 1      |
| 4            | 4       | 5          | 0            | 0           | 0            | 1           | 0             | 2             | 2      |
| 1            | 4       | 5          | 0            | 1           | 0            | 0           | 0             | 1             | 1      |
| 4            | 4       | 4          | 0            | 1           | 0            | 0           | 0             | 1             | 4      |

|   |   |   |   |   |   |   |   |   |   |
|---|---|---|---|---|---|---|---|---|---|
| 5 | 2 | 3 | 1 | 0 | 0 | 0 | 0 | 3 | 5 |
| 4 | 4 | 4 | 1 | 0 | 0 | 0 | 0 | 4 | 3 |
| 2 | 4 | 5 | 0 | 0 | 0 | 1 | 0 | 2 | 4 |
| 2 | 4 | 5 | 0 | 1 | 0 | 1 | 0 | 1 | 3 |
| 2 | 4 | 4 | 0 | 0 | 0 | 1 | 0 | 1 | 1 |
| 3 | 4 | 5 | 0 | 1 | 0 | 0 | 0 | 5 | 2 |
| 4 | 4 | 1 | 1 | 1 | 0 | 0 | 0 | 1 | 3 |
| 4 | 3 | 2 | 1 | 0 | 0 | 0 | 0 | 1 | 4 |
| 4 | 3 | 3 | 1 | 0 | 0 | 0 | 0 | 2 | 3 |
| 4 | 3 | 3 | 0 | 0 | 0 | 0 | 0 | 2 | 3 |
| 3 | 2 | 3 | 1 | 0 | 1 | 0 | 0 | 2 | 2 |
| 4 | 4 | 4 | 0 | 0 | 0 | 1 | 0 | 2 | 2 |
| 4 | 3 | 1 | 0 | 0 | 0 | 1 | 0 | 1 | 3 |
| 4 | 3 | 4 | 0 | 0 | 0 | 1 | 0 | 1 | 3 |
| 5 | 4 | 5 | 1 | 0 | 0 | 0 | 0 | 1 | 4 |
| 3 | 3 | 3 | 1 | 0 | 0 | 0 | 0 | 3 | 3 |
| 3 | 4 | 4 | 0 | 0 | 0 | 1 | 0 | 1 | 1 |
| 4 | 4 | 5 | 0 | 1 | 0 | 0 | 0 | 1 | 5 |
| 4 | 4 | 3 | 1 | 1 | 0 | 0 | 0 | 3 | 3 |
| 4 | 4 | 4 | 0 | 0 | 0 | 1 | 0 | 1 | 4 |
| 4 | 3 | 3 | 1 | 0 | 0 | 0 | 0 | 3 | 3 |
| 5 | 4 | 4 | 1 | 0 | 0 | 0 | 0 | 1 | 2 |
| 4 | 4 | 5 | 0 | 1 | 0 | 0 | 0 | 1 | 2 |
| 5 | 4 | 4 | 1 | 0 | 0 | 0 | 0 | 2 | 4 |
| 3 | 4 | 5 | 0 | 0 | 0 | 1 | 0 | 1 | 4 |
| 4 | 3 | 4 | 0 | 0 | 0 | 1 | 0 | 2 | 4 |
| 5 | 4 | 4 | 0 | 1 | 0 | 0 | 1 | 1 | 2 |
| 3 | 4 | 4 | 0 | 0 | 0 | 1 | 0 | 2 | 1 |
| 5 | 4 | 5 | 0 | 0 | 0 | 1 | 0 | 1 | 3 |
| 3 | 2 | 2 | 1 | 0 | 0 | 1 | 0 | 3 | 3 |
| 4 | 4 | 4 | 1 | 1 | 0 | 0 | 0 | 2 | 3 |

|   |   |   |   |   |   |   |   |   |   |
|---|---|---|---|---|---|---|---|---|---|
| 4 | 4 | 4 | 0 | 0 | 0 | 0 | 0 | 2 | 3 |
| 3 | 3 | 3 | 1 | 0 | 0 | 0 | 0 | 3 | 4 |
| 2 | 4 | 4 | 0 | 0 | 0 | 1 | 0 | 3 | 3 |
| 5 | 3 | 3 | 1 | 0 | 0 | 0 | 0 | 2 | 3 |
| 3 | 2 | 4 | 1 | 0 | 0 | 0 | 0 | 1 | 4 |
| 3 | 3 | 2 | 1 | 0 | 0 | 0 | 1 | 2 | 4 |
| 3 | 3 | 5 | 0 | 1 | 0 | 0 | 0 | 1 | 2 |
| 2 | 3 | 3 | 1 | 0 | 0 | 0 | 0 | 3 | 3 |
| 2 | 3 | 2 | 1 | 0 | 0 | 1 | 0 | 3 | 3 |
| 5 | 3 | 4 | 1 | 0 | 0 | 0 | 0 | 2 | 4 |
| 2 | 3 | 3 | 1 | 0 | 0 | 0 | 0 | 3 | 4 |
| 5 | 4 | 4 | 0 | 0 | 0 | 1 | 0 | 1 | 5 |
| 3 | 4 | 4 | 1 | 1 | 0 | 0 | 0 | 1 | 4 |
| 4 | 3 | 2 | 1 | 0 | 0 | 0 | 0 | 2 | 3 |
| 5 | 3 | 2 | 0 | 0 | 0 | 1 | 0 | 2 | 4 |
| 5 | 4 | 5 | 0 | 1 | 0 | 0 | 0 | 1 | 1 |
| 3 | 4 | 3 | 0 | 0 | 0 | 1 | 0 | 1 | 2 |
| 4 | 3 | 4 | 1 | 1 | 1 | 0 | 0 | 2 | 4 |
| 2 | 3 | 2 | 1 | 0 | 0 | 0 | 0 | 2 | 3 |
| 5 | 4 | 4 | 1 | 0 | 0 | 0 | 0 | 2 | 3 |
| 3 | 3 | 5 | 0 | 1 | 0 | 0 | 0 | 1 | 5 |
| 4 | 4 | 5 | 0 | 1 | 0 | 0 | 0 | 1 | 3 |
| 3 | 4 | 4 | 1 | 0 | 0 | 0 | 0 | 2 | 2 |
| 2 | 4 | 5 | 1 | 1 | 0 | 0 | 0 | 1 | 2 |
| 2 | 4 | 5 | 0 | 0 | 0 | 1 | 0 | 1 | 4 |
| 3 | 4 | 4 | 0 | 1 | 0 | 0 | 0 | 3 | 2 |
| 2 | 4 | 4 | 0 | 0 | 0 | 1 | 0 | 2 | 3 |
| 3 | 3 | 2 | 1 | 0 | 0 | 0 | 0 | 4 | 4 |
| 5 | 3 | 4 | 1 | 0 | 0 | 1 | 0 | 2 | 3 |
| 4 | 3 | 3 | 0 | 0 | 0 | 1 | 0 | 1 | 5 |
| 3 | 2 | 4 | 0 | 0 | 1 | 0 | 0 | 1 | 4 |

|   |   |   |   |   |   |   |   |   |   |
|---|---|---|---|---|---|---|---|---|---|
| 4 | 3 | 4 | 1 | 0 | 0 | 0 | 0 | 1 | 4 |
| 4 | 3 | 3 | 1 | 0 | 0 | 1 | 0 | 3 | 3 |
| 4 | 4 | 2 | 0 | 1 | 0 | 0 | 0 | 2 | 3 |
| 3 | 3 | 4 | 1 | 0 | 0 | 0 | 0 | 2 | 4 |
| 3 | 3 | 3 | 0 | 0 | 1 | 0 | 0 | 4 | 4 |
| 3 | 3 | 2 | 1 | 1 | 0 | 0 | 0 | 1 | 4 |
| 4 | 3 | 2 | 1 | 0 | 0 | 0 | 0 | 2 | 3 |
| 4 | 4 | 5 | 0 | 0 | 0 | 1 | 0 | 1 | 3 |
| 4 | 3 | 2 | 1 | 0 | 0 | 0 | 0 | 3 | 4 |
| 4 | 2 | 2 | 1 | 0 | 1 | 0 | 0 | 2 | 4 |
| 3 | 3 | 2 | 1 | 1 | 0 | 0 | 0 | 3 | 2 |
| 5 | 4 | 4 | 1 | 0 | 0 | 0 | 0 | 2 | 3 |
| 5 | 3 | 3 | 0 | 1 | 0 | 0 | 0 | 2 | 4 |
| 5 | 4 | 4 | 0 | 0 | 0 | 1 | 0 | 2 | 3 |
| 5 | 4 | 5 | 0 | 0 | 0 | 1 | 0 | 1 | 4 |
| 4 | 4 | 5 | 1 | 0 | 0 | 0 | 0 | 2 | 3 |



| clinical_ansv | books | presentation | articles | pocs | metaanalyse | guidelines | open_access | colleague | scihub |
|---------------|-------|--------------|----------|------|-------------|------------|-------------|-----------|--------|
| 5             | 0     | 0            | 1        | 0    | 0           | 1          | 0           | 1         | 0      |
| 4             | 0     | 0            | 1        | 1    | 0           | 1          | 0           | 0         | 0      |
| 5             | 1     | 0            | 1        | 0    | 1           | 0          | 0           | 0         | 1      |
| 4             | 1     | 0            | 0        | 1    | 0           | 1          | 0           | 0         | 0      |
| 3             | 1     | 0            | 0        | 0    | 1           | 1          | 0           | 0         | 0      |
| 5             | 0     | 0            | 0        | 1    | 0           | 1          | 1           | 0         | 0      |
| 5             | 0     | 1            | 1        | 1    | 0           | 0          | 0           | 0         | 0      |
| 4             | 0     | 0            | 1        | 1    | 1           | 1          | 0           | 0         | 0      |
| 3             | 0     | 0            | 1        | 1    | 0           | 1          | 0           | 0         | 0      |
| 5             | 0     | 0            | 1        | 1    | 0           | 1          | 0           | 0         | 0      |
| 5             | 0     | 0            | 0        | 0    | 0           | 0          | 0           | 0         | 0      |
| 5             | 1     | 0            | 1        | 1    | 1           | 0          | 0           | 0         | 0      |
| 3             | 0     | 1            | 0        | 1    | 0           | 1          | 0           | 0         | 0      |
| 4             | 0     | 0            | 1        | 0    | 1           | 1          | 0           | 0         | 0      |
| 3             | 0     | 1            | 0        | 0    | 0           | 1          | 0           | 0         | 1      |
| 4             | 0     | 0            | 1        | 0    | 1           | 1          | 0           | 0         | 0      |
| 5             | 1     | 0            | 0        | 0    | 0           | 1          | 0           | 0         | 0      |
| 4             | 1     | 0            | 1        | 0    | 0           | 1          | 0           | 0         | 0      |
| 5             | 0     | 0            | 1        | 0    | 0           | 1          | 0           | 1         | 0      |
| 2             | 0     | 0            | 0        | 1    | 0           | 1          | 0           | 0         | 1      |
| 4             | 0     | 0            | 0        | 1    | 0           | 1          | 0           | 1         | 0      |
| 4             | 1     | 0            | 0        | 1    | 0           | 1          | 0           | 1         | 0      |
| 3             | 1     | 0            | 1        | 1    | 0           | 0          | 0           | 0         | 0      |
| 5             | 0     | 0            | 1        | 0    | 1           | 1          | 0           | 0         | 0      |
| 3             | 0     | 0            | 0        | 1    | 0           | 1          | 0           | 1         | 0      |
| 3             | 0     | 0            | 0        | 1    | 1           | 1          | 0           | 1         | 0      |
| 5             | 0     | 0            | 1        | 1    | 0           | 0          | 0           | 0         | 0      |
| 3             | 0     | 0            | 1        | 0    | 1           | 1          | 0           | 0         | 0      |
| 5             | 0     | 0            | 1        | 1    | 1           | 0          | 0           | 0         | 0      |
| 4             | 1     | 0            | 1        | 0    | 0           | 1          | 0           | 0         | 0      |

|   |   |   |   |   |   |   |   |   |   |
|---|---|---|---|---|---|---|---|---|---|
| 5 | 1 | 0 | 0 | 0 | 0 | 0 | 0 | 0 | 0 |
| 3 | 0 | 0 | 1 | 0 | 1 | 1 | 0 | 0 | 1 |
| 5 | 0 | 0 | 1 | 0 | 0 | 0 | 0 | 1 | 1 |
| 4 | 0 | 0 | 0 | 0 | 0 | 1 | 0 | 0 | 1 |
| 1 | 0 | 0 | 1 | 1 | 0 | 0 | 0 | 0 | 1 |
| 2 | 0 | 0 | 1 | 0 | 1 | 1 | 0 | 0 | 0 |
| 4 | 0 | 0 | 0 | 0 | 1 | 1 | 0 | 0 | 1 |
| 4 | 1 | 0 | 1 | 0 | 0 | 1 | 0 | 0 | 0 |
| 4 | 0 | 0 | 1 | 0 | 1 | 0 | 0 | 0 | 0 |
| 4 | 0 | 0 | 0 | 0 | 0 | 0 | 0 | 0 | 0 |
| 2 | 1 | 1 | 1 | 0 | 0 | 1 | 0 | 0 | 0 |
| 2 | 0 | 0 | 1 | 0 | 1 | 1 | 0 | 0 | 0 |
| 4 | 0 | 0 | 0 | 0 | 1 | 1 | 0 | 0 | 0 |
| 5 | 0 | 0 | 1 | 0 | 1 | 1 | 0 | 0 | 0 |
| 5 | 0 | 0 | 1 | 1 | 0 | 1 | 0 | 0 | 0 |
| 4 | 1 | 0 | 1 | 0 | 0 | 0 | 0 | 0 | 0 |
| 4 | 0 | 0 | 0 | 1 | 1 | 1 | 0 | 0 | 0 |
| 5 | 0 | 0 | 1 | 0 | 1 | 0 | 0 | 1 | 0 |
| 2 | 0 | 0 | 1 | 1 | 1 | 1 | 0 | 0 | 1 |
| 5 | 0 | 0 | 1 | 0 | 1 | 1 | 0 | 0 | 0 |
| 2 | 0 | 0 | 1 | 1 | 0 | 1 | 0 | 0 | 0 |
| 4 | 0 | 0 | 1 | 1 | 1 | 1 | 0 | 0 | 0 |
| 5 | 0 | 0 | 1 | 0 | 1 | 1 | 0 | 0 | 0 |
| 3 | 1 | 0 | 0 | 0 | 1 | 1 | 0 | 0 | 0 |
| 5 | 0 | 0 | 1 | 0 | 1 | 1 | 0 | 0 | 0 |
| 5 | 0 | 0 | 1 | 1 | 0 | 1 | 0 | 0 | 0 |
| 3 | 0 | 0 | 1 | 0 | 1 | 1 | 0 | 0 | 0 |
| 4 | 0 | 0 | 0 | 1 | 1 | 1 | 0 | 0 | 1 |
| 5 | 0 | 0 | 0 | 1 | 1 | 1 | 0 | 0 | 0 |
| 4 | 1 | 0 | 0 | 0 | 1 | 1 | 0 | 0 | 0 |
| 4 | 1 | 0 | 0 | 0 | 0 | 1 | 0 | 1 | 0 |

|   |   |   |   |   |   |   |   |   |   |
|---|---|---|---|---|---|---|---|---|---|
| 4 | 0 | 0 | 0 | 0 | 0 | 0 | 0 | 0 | 0 |
| 4 | 0 | 0 | 1 | 1 | 0 | 1 | 0 | 0 | 0 |
| 4 | 1 | 0 | 1 | 0 | 0 | 1 | 0 | 0 | 0 |
| 3 | 0 | 1 | 1 | 0 | 0 | 1 | 0 | 0 | 0 |
| 4 | 0 | 0 | 1 | 0 | 1 | 1 | 0 | 0 | 0 |
| 4 | 0 | 0 | 1 | 1 | 0 | 1 | 0 | 0 | 0 |
| 1 | 0 | 0 | 1 | 0 | 1 | 1 | 0 | 0 | 0 |
| 4 | 0 | 0 | 1 | 0 | 0 | 1 | 0 | 0 | 0 |
| 3 | 0 | 1 | 0 | 1 | 0 | 0 | 0 | 1 | 0 |
| 5 | 1 | 0 | 1 | 0 | 0 | 0 | 0 | 0 | 0 |
| 4 | 0 | 0 | 0 | 1 | 1 | 1 | 0 | 0 | 0 |
| 5 | 1 | 0 | 1 | 0 | 1 | 0 | 0 | 0 | 0 |
| 3 | 0 | 0 | 1 | 0 | 1 | 1 | 0 | 0 | 0 |
| 3 | 1 | 0 | 0 | 0 | 0 | 0 | 0 | 1 | 0 |
| 5 | 0 | 0 | 1 | 0 | 1 | 1 | 0 | 0 | 0 |
| 5 | 1 | 0 | 1 | 0 | 1 | 0 | 0 | 0 | 0 |
| 2 | 1 | 0 | 0 | 0 | 0 | 1 | 0 | 0 | 1 |
| 5 | 1 | 0 | 1 | 0 | 0 | 1 | 0 | 0 | 0 |
| 3 | 0 | 0 | 1 | 0 | 1 | 1 | 0 | 0 | 0 |
| 4 | 0 | 0 | 0 | 1 | 1 | 1 | 0 | 0 | 0 |
| 5 | 0 | 0 | 1 | 1 | 1 | 1 | 0 | 1 | 0 |
| 4 | 0 | 0 | 1 | 0 | 1 | 1 | 0 | 0 | 0 |
| 2 | 0 | 1 | 0 | 1 | 0 | 0 | 0 | 0 | 0 |
| 3 | 0 | 0 | 1 | 0 | 1 | 1 | 0 | 0 | 0 |
| 4 | 0 | 0 | 0 | 1 | 1 | 1 | 0 | 0 | 0 |
| 3 | 1 | 0 | 1 | 0 | 1 | 1 | 0 | 0 | 1 |
| 3 | 0 | 0 | 1 | 1 | 0 | 1 | 0 | 0 | 0 |
| 5 | 1 | 0 | 1 | 0 | 1 | 0 | 0 | 0 | 0 |
| 5 | 1 | 0 | 0 | 1 | 1 | 0 | 0 | 0 | 0 |
| 3 | 1 | 0 | 1 | 0 | 0 | 1 | 0 | 0 | 0 |
| 5 | 1 | 0 | 0 | 0 | 0 | 1 | 0 | 1 | 0 |

|   |   |   |   |   |   |   |   |   |   |
|---|---|---|---|---|---|---|---|---|---|
| 4 | 0 | 0 | 0 | 1 | 1 | 1 | 0 | 0 | 0 |
| 3 | 0 | 0 | 0 | 1 | 0 | 1 | 1 | 0 | 0 |
| 3 | 1 | 0 | 0 | 1 | 0 | 1 | 0 | 0 | 0 |
| 4 | 0 | 0 | 0 | 1 | 1 | 0 | 0 | 0 | 0 |
| 4 | 0 | 0 | 0 | 1 | 0 | 1 | 0 | 1 | 0 |
| 4 | 0 | 0 | 1 | 0 | 0 | 1 | 0 | 1 | 0 |
| 5 | 0 | 1 | 1 | 0 | 1 | 1 | 0 | 1 | 0 |
| 3 | 0 | 0 | 1 | 0 | 1 | 0 | 0 | 0 | 1 |
| 3 | 1 | 0 | 1 | 0 | 1 | 0 | 0 | 0 | 0 |
| 4 | 1 | 0 | 0 | 0 | 1 | 1 | 0 | 1 | 0 |
| 4 | 0 | 0 | 1 | 1 | 0 | 1 | 0 | 0 | 0 |
| 5 | 1 | 0 | 0 | 0 | 0 | 1 | 0 | 0 | 0 |
| 5 | 1 | 0 | 0 | 1 | 0 | 1 | 0 | 0 | 0 |
| 5 | 1 | 0 | 0 | 0 | 1 | 1 | 0 | 0 | 0 |
| 5 | 0 | 0 | 1 | 1 | 0 | 1 | 0 | 0 | 0 |
| 5 | 0 | 0 | 1 | 1 | 0 | 1 | 0 | 0 | 0 |

| abstracts | other | pay_walls | interpret_ap | map | vasopressors | hemoglobin | sepsis_book | sepsis_prese | sepsis_articl |   |
|-----------|-------|-----------|--------------|-----|--------------|------------|-------------|--------------|---------------|---|
| 0         | 0     | 0         | 5            | 1   | 3            | 2          | 1           | 0            | 0             | 1 |
| 0         | 0     | 0         | 5            | 1   | 2            | 2          | 1           | 0            | 0             | 1 |
| 0         | 0     | 0         | 5            | 3   | 2            | 2          | 1           | 0            | 0             | 0 |
| 0         | 0     | 0         | 5            | 2   | 1            | 2          | 1           | 1            | 0             | 0 |
| 0         | 0     | 0         | 5            | 2   | 3            | 3          | 1           | 0            | 0             | 0 |
| 0         | 0     | 0         | 4            | 1   | 3            | 2          | 1           | 0            | 0             | 0 |
| 0         | 0     | 0         | 5            | 1   | 4            | 2          | 1           | 0            | 0             | 1 |
| 0         | 0     | 0         | 5            | 1   | 3            | 2          | 1           | 0            | 1             | 0 |
| 0         | 0     | 0         | 4            | 2   | 2            | 2          | 1           | 0            | 0             | 0 |
| 0         | 0     | 0         | 5            | 1   | 3            | 2          | 1           | 0            | 0             | 1 |
| 0         | 0     | 0         | 4            | 1   | 3            | 2          | 1           | 0            | 0             | 0 |
| 0         | 0     | 0         | 5            | 2   | 3            | 2          | 1           | 0            | 0             | 0 |
| 0         | 0     | 0         | 2            | 2   | 4            | 3          | 1           | 0            | 0             | 0 |
| 0         | 0     | 0         | 1            | 1   | 2            | 2          | 1           | 0            | 0             | 1 |
| 0         | 0     | 0         | 3            | 2   | 3            | 2          | 1           | 0            | 0             | 0 |
| 0         | 0     | 0         | 5            | 1   | 3            | 4          | 2           | 0            | 0             | 1 |
| 0         | 0     | 0         | 3            | 2   | 3            | 2          | 1           | 1            | 0             | 0 |
| 0         | 0     | 0         | 4            | 2   | 3            | 2          | 1           | 0            | 0             | 1 |
| 0         | 0     | 0         | 1            | 1   | 3            | 2          | 1           | 0            | 0             | 1 |
| 0         | 0     | 0         | 3            | 2   | 3            | 2          | 1           | 0            | 0             | 0 |
| 0         | 0     | 0         | 5            | 3   | 3            | 2          | 1           | 0            | 0             | 0 |
| 0         | 0     | 0         | 2            | 2   | 4            | 5          | 2           | 0            | 0             | 0 |
| 0         | 0     | 0         | 5            | 1   | 4            | 2          | 1           | 1            | 0             | 1 |
| 0         | 0     | 0         | 5            | 1   | 4            | 2          | 2           | 0            | 0             | 0 |
| 0         | 0     | 0         | 4            | 1   | 3            | 2          | 1           | 0            | 0             | 0 |
| 0         | 0     | 0         | 5            | 1   | 2            | 2          | 1           | 0            | 0             | 0 |
| 0         | 0     | 0         | 5            | 1   | 3            | 2          | 1           | 0            | 0             | 1 |
| 0         | 0     | 0         | 1            | 2   | 3            | 2          | 1           | 0            | 0             | 1 |
| 0         | 0     | 0         | 6            | 2   | 3            | 2          | 1           | 0            | 0             | 0 |
| 0         | 0     | 0         | 4            | 2   | 2            | 2          | 1           | 0            | 0             | 0 |

|   |   |   |   |   |   |   |   |   |   |
|---|---|---|---|---|---|---|---|---|---|
| 0 | 0 | 2 | 2 | 1 | 2 | 1 | 1 | 0 | 0 |
| 0 | 0 | 1 | 2 | 2 | 2 | 2 | 0 | 0 | 1 |
| 0 | 0 | 3 | 2 | 3 | 2 | 2 | 0 | 0 | 1 |
| 0 | 0 | 3 | 2 | 3 | 2 | 1 | 0 | 0 | 1 |
| 0 | 0 | 3 | 2 | 3 | 2 | 1 | 0 | 0 | 0 |
| 0 | 0 | 5 | 3 | 2 | 2 | 1 | 1 | 0 | 0 |
| 0 | 0 | 3 | 3 | 3 | 2 | 2 | 0 | 0 | 1 |
| 0 | 0 | 1 | 2 | 4 | 3 | 1 | 0 | 1 | 0 |
| 0 | 0 | 2 | 1 | 1 | 1 | 1 | 0 | 0 | 0 |
| 0 | 0 | 2 | 1 | 1 | 1 | 1 | 0 | 0 | 0 |
| 0 | 0 | 4 | 4 | 1 | 1 | 1 | 1 | 0 | 0 |
| 0 | 0 | 4 | 2 | 3 | 2 | 1 | 0 | 0 | 1 |
| 0 | 0 | 4 | 1 | 4 | 5 | 1 | 1 | 0 | 1 |
| 0 | 0 | 6 | 1 | 3 | 2 | 1 | 0 | 0 | 1 |
| 0 | 0 | 2 | 2 | 3 | 2 | 1 | 0 | 0 | 0 |
| 1 | 0 | 1 | 2 | 3 | 1 | 1 | 0 | 0 | 0 |
| 0 | 0 | 3 | 2 | 3 | 2 | 2 | 0 | 0 | 0 |
| 0 | 0 | 5 | 1 | 4 | 2 | 3 | 0 | 0 | 1 |
| 0 | 0 | 3 | 3 | 4 | 4 | 1 | 0 | 0 | 0 |
| 0 | 0 | 5 | 2 | 4 | 2 | 1 | 0 | 0 | 1 |
| 0 | 0 | 6 | 2 | 3 | 2 | 1 | 0 | 0 | 1 |
| 1 | 0 | 4 | 2 | 2 | 5 | 1 | 0 | 0 | 0 |
| 0 | 0 | 1 | 1 | 2 | 4 | 1 | 0 | 0 | 1 |
| 0 | 0 | 1 | 2 | 4 | 1 | 1 | 1 | 0 | 1 |
| 0 | 0 | 5 | 1 | 3 | 2 | 1 | 0 | 0 | 1 |
| 0 | 0 | 4 | 2 | 3 | 3 | 1 | 0 | 0 | 0 |
| 0 | 0 | 4 | 2 | 1 | 2 | 1 | 0 | 0 | 1 |
| 1 | 0 | 3 | 1 | 3 | 2 | 1 | 0 | 0 | 0 |
| 0 | 0 | 4 | 1 | 3 | 3 | 3 | 0 | 0 | 0 |
| 0 | 0 | 1 | 3 | 3 | 2 | 1 | 1 | 0 | 0 |
| 0 | 0 | 1 | 2 | 1 | 1 | 1 | 1 | 0 | 0 |

|   |   |   |   |   |   |   |   |   |   |
|---|---|---|---|---|---|---|---|---|---|
| 0 | 0 | 1 | 2 | 1 | 1 | 1 | 0 | 0 | 0 |
| 0 | 0 | 5 | 2 | 3 | 2 | 1 | 1 | 0 | 0 |
| 0 | 0 | 1 | 2 | 2 | 2 | 1 | 1 | 0 | 0 |
| 0 | 0 | 5 | 1 | 1 | 3 | 1 | 0 | 0 | 0 |
| 0 | 0 | 2 | 2 | 4 | 2 | 2 | 0 | 0 | 0 |
| 0 | 0 | 4 | 1 | 3 | 2 | 1 | 0 | 0 | 1 |
| 0 | 0 | 6 | 1 | 3 | 2 | 1 | 0 | 0 | 1 |
| 0 | 0 | 2 | 3 | 3 | 2 | 1 | 0 | 0 | 0 |
| 0 | 0 | 5 | 3 | 4 | 2 | 1 | 0 | 0 | 0 |
| 1 | 0 | 4 | 1 | 4 | 5 | 1 | 1 | 0 | 1 |
| 0 | 0 | 4 | 2 | 3 | 2 | 2 | 0 | 0 | 0 |
| 0 | 0 | 4 | 1 | 4 | 2 | 1 | 1 | 1 | 1 |
| 0 | 0 | 5 | 2 | 2 | 2 | 1 | 0 | 0 | 0 |
| 0 | 1 | 3 | 2 | 3 | 2 | 1 | 1 | 1 | 0 |
| 0 | 0 | 4 | 2 | 2 | 2 | 1 | 0 | 0 | 1 |
| 0 | 0 | 4 | 1 | 3 | 2 | 1 | 0 | 1 | 0 |
| 0 | 0 | 3 | 2 | 2 | 1 | 1 | 0 | 0 | 0 |
| 0 | 0 | 4 | 3 | 4 | 2 | 1 | 1 | 0 | 0 |
| 0 | 0 | 2 | 2 | 3 | 5 | 1 | 1 | 0 | 1 |
| 0 | 0 | 1 | 2 | 4 | 2 | 2 | 0 | 0 | 0 |
| 0 | 0 | 4 | 1 | 3 | 2 | 1 | 0 | 0 | 0 |
| 0 | 0 | 4 | 1 | 2 | 2 | 1 | 0 | 0 | 0 |
| 1 | 0 | 2 | 3 | 3 | 2 | 1 | 0 | 0 | 0 |
| 0 | 0 | 1 | 1 | 3 | 2 | 1 | 1 | 0 | 1 |
| 0 | 0 | 6 | 1 | 2 | 2 | 2 | 0 | 0 | 1 |
| 0 | 0 | 3 | 1 | 3 | 2 | 1 | 0 | 0 | 1 |
| 0 | 0 | 1 | 3 | 2 | 1 | 1 | 0 | 0 | 0 |
| 0 | 0 | 4 | 2 | 3 | 2 | 1 | 1 | 0 | 0 |
| 0 | 0 | 2 | 2 | 3 | 2 | 2 | 0 | 0 | 0 |
| 0 | 0 | 4 | 2 | 4 | 2 | 2 | 0 | 0 | 0 |
| 0 | 0 | 1 | 2 | 4 | 2 | 2 | 1 | 1 | 1 |

|   |   |   |   |   |   |   |   |   |   |
|---|---|---|---|---|---|---|---|---|---|
| 0 | 0 | 3 | 2 | 3 | 2 | 1 | 0 | 0 | 0 |
| 0 | 0 | 1 | 3 | 3 | 2 | 1 | 0 | 1 | 0 |
| 0 | 0 | 2 | 2 | 1 | 5 | 2 | 0 | 0 | 0 |
| 1 | 0 | 4 | 2 | 2 | 2 | 2 | 0 | 0 | 1 |
| 0 | 0 | 1 | 2 | 4 | 1 | 1 | 0 | 0 | 0 |
| 0 | 0 | 4 | 1 | 3 | 2 | 1 | 1 | 0 | 1 |
| 0 | 0 | 4 | 3 | 3 | 2 | 2 | 0 | 1 | 1 |
| 0 | 0 | 3 | 1 | 3 | 2 | 1 | 0 | 0 | 0 |
| 0 | 0 | 6 | 3 | 2 | 2 | 1 | 1 | 0 | 0 |
| 0 | 0 | 2 | 2 | 3 | 4 | 1 | 0 | 1 | 1 |
| 0 | 0 | 2 | 2 | 4 | 2 | 1 | 0 | 0 | 0 |
| 0 | 0 | 5 | 2 | 2 | 2 | 1 | 0 | 0 | 0 |
| 0 | 0 | 6 | 2 | 4 | 2 | 1 | 1 | 0 | 0 |
| 0 | 0 | 5 | 2 | 3 | 3 | 1 | 0 | 0 | 0 |
| 0 | 0 | 4 | 2 | 3 | 2 | 1 | 0 | 0 | 0 |
| 0 | 0 | 4 | 2 | 2 | 1 | 1 | 0 | 0 | 1 |



| sepsis_pocs | sepsis_meta | sepsis_guide | sepsis_open | sepsis_colle | sepsis_scihu | sepsis_abstr | sepsis_other | abx | drain |   |
|-------------|-------------|--------------|-------------|--------------|--------------|--------------|--------------|-----|-------|---|
| 0           | 0           | 1            | 0           | 1            | 0            | 0            | 0            | 0   | 1     | 2 |
| 0           | 0           | 0            | 0           | 0            | 0            | 0            | 0            | 0   | 1     | 2 |
| 0           | 0           | 1            | 0           | 0            | 0            | 0            | 0            | 0   | 1     | 2 |
| 0           | 0           | 0            | 0           | 0            | 0            | 0            | 0            | 0   | 2     | 2 |
| 1           | 1           | 1            | 0           | 0            | 0            | 0            | 0            | 0   | 3     | 2 |
| 1           | 0           | 0            | 0           | 0            | 0            | 0            | 0            | 0   | 1     | 2 |
| 1           | 0           | 1            | 0           | 0            | 0            | 0            | 0            | 0   | 1     | 2 |
| 1           | 1           | 1            | 0           | 1            | 0            | 0            | 0            | 0   | 1     | 2 |
| 0           | 0           | 0            | 1           | 0            | 0            | 0            | 0            | 0   | 1     | 2 |
| 1           | 0           | 1            | 0           | 0            | 0            | 0            | 0            | 0   | 1     | 2 |
| 0           | 0           | 0            | 0           | 0            | 0            | 0            | 0            | 0   | 1     | 2 |
| 0           | 0           | 0            | 0           | 0            | 0            | 0            | 0            | 1   | 1     | 2 |
| 0           | 0           | 0            | 0           | 0            | 0            | 0            | 0            | 1   | 1     | 2 |
| 0           | 1           | 1            | 0           | 0            | 0            | 0            | 0            | 0   | 1     | 2 |
| 0           | 0           | 0            | 0           | 0            | 0            | 1            | 1            | 1   | 1     | 3 |
| 0           | 0           | 1            | 0           | 0            | 0            | 0            | 0            | 0   | 1     | 2 |
| 0           | 1           | 1            | 0           | 0            | 0            | 0            | 0            | 0   | 1     | 2 |
| 0           | 0           | 0            | 0           | 0            | 0            | 0            | 0            | 0   | 1     | 2 |
| 0           | 0           | 0            | 0           | 0            | 0            | 0            | 0            | 0   | 1     | 2 |
| 0           | 0           | 0            | 0           | 0            | 0            | 0            | 0            | 0   | 1     | 2 |
| 0           | 0           | 0            | 0           | 0            | 0            | 0            | 0            | 1   | 1     | 2 |
| 1           | 0           | 1            | 0           | 1            | 0            | 0            | 0            | 0   | 2     | 2 |
| 0           | 0           | 0            | 0           | 1            | 0            | 0            | 0            | 0   | 2     | 2 |
| 1           | 0           | 0            | 0           | 0            | 0            | 0            | 0            | 0   | 1     | 2 |
| 0           | 1           | 1            | 0           | 0            | 0            | 0            | 0            | 0   | 1     | 2 |
| 1           | 0           | 0            | 0           | 0            | 0            | 0            | 0            | 0   | 1     | 2 |
| 0           | 0           | 1            | 0           | 0            | 0            | 0            | 0            | 0   | 1     | 2 |
| 1           | 0           | 0            | 0           | 0            | 0            | 0            | 0            | 0   | 1     | 2 |
| 0           | 1           | 1            | 0           | 0            | 0            | 0            | 0            | 0   | 1     | 2 |
| 1           | 0           | 1            | 0           | 0            | 0            | 0            | 0            | 0   | 1     | 2 |
| 0           | 0           | 1            | 0           | 0            | 0            | 0            | 0            | 0   | 1     | 2 |

|   |   |   |   |   |   |   |   |   |   |
|---|---|---|---|---|---|---|---|---|---|
| 0 | 0 | 1 | 0 | 0 | 0 | 0 | 1 | 1 | 2 |
| 1 | 1 | 0 | 0 | 0 | 0 | 0 | 0 | 3 | 2 |
| 0 | 0 | 0 | 0 | 0 | 0 | 0 | 0 | 1 | 2 |
| 0 | 0 | 1 | 0 | 0 | 1 | 0 | 0 | 1 | 2 |
| 0 | 0 | 0 | 0 | 0 | 0 | 0 | 1 | 1 | 2 |
| 0 | 0 | 0 | 0 | 0 | 0 | 0 | 0 | 1 | 3 |
| 1 | 1 | 1 | 0 | 0 | 1 | 0 | 0 | 1 | 3 |
| 1 | 0 | 0 | 0 | 0 | 0 | 0 | 0 | 1 | 2 |
| 1 | 0 | 1 | 0 | 0 | 0 | 0 | 0 | 1 | 3 |
| 0 | 0 | 0 | 0 | 0 | 0 | 0 | 0 | 1 | 3 |
| 1 | 0 | 0 | 0 | 1 | 0 | 0 | 0 | 3 | 2 |
| 0 | 0 | 0 | 0 | 0 | 0 | 0 | 0 | 1 | 2 |
| 1 | 0 | 0 | 0 | 1 | 0 | 0 | 0 | 1 | 2 |
| 0 | 0 | 0 | 0 | 0 | 0 | 0 | 0 | 1 | 2 |
| 0 | 0 | 0 | 0 | 0 | 0 | 0 | 1 | 3 | 2 |
| 0 | 0 | 0 | 1 | 0 | 0 | 0 | 0 | 1 | 2 |
| 0 | 0 | 1 | 0 | 0 | 0 | 0 | 0 | 4 | 2 |
| 0 | 0 | 0 | 0 | 0 | 0 | 0 | 0 | 1 | 2 |
| 0 | 0 | 0 | 0 | 1 | 0 | 0 | 0 | 1 | 2 |
| 0 | 0 | 0 | 0 | 0 | 0 | 0 | 0 | 1 | 2 |
| 0 | 0 | 0 | 0 | 0 | 0 | 0 | 0 | 1 | 2 |
| 0 | 0 | 0 | 1 | 0 | 0 | 0 | 0 | 1 | 3 |
| 0 | 0 | 1 | 0 | 0 | 0 | 0 | 0 | 1 | 2 |
| 0 | 1 | 1 | 0 | 0 | 0 | 0 | 0 | 2 | 2 |
| 0 | 1 | 1 | 0 | 0 | 0 | 0 | 0 | 3 | 3 |
| 0 | 0 | 1 | 0 | 0 | 0 | 0 | 0 | 4 | 3 |
| 0 | 0 | 1 | 0 | 0 | 0 | 0 | 0 | 3 | 1 |
| 0 | 1 | 1 | 0 | 0 | 0 | 0 | 0 | 1 | 2 |
| 1 | 0 | 0 | 0 | 0 | 0 | 0 | 0 | 1 | 3 |
| 0 | 0 | 0 | 0 | 0 | 0 | 0 | 1 | 1 | 3 |
| 0 | 0 | 1 | 0 | 0 | 0 | 0 | 0 | 1 | 3 |
| 0 | 0 | 0 | 0 | 0 | 0 | 1 | 0 | 1 | 2 |

|   |   |   |   |   |   |   |   |   |   |
|---|---|---|---|---|---|---|---|---|---|
| 0 | 0 | 0 | 0 | 0 | 0 | 0 | 0 | 1 | 2 |
| 0 | 0 | 1 | 0 | 0 | 0 | 0 | 0 | 1 | 2 |
| 0 | 0 | 0 | 0 | 0 | 0 | 0 | 0 | 1 | 2 |
| 1 | 1 | 1 | 0 | 0 | 0 | 0 | 0 | 1 | 2 |
| 0 | 0 | 0 | 0 | 0 | 0 | 0 | 1 | 3 | 3 |
| 0 | 0 | 1 | 0 | 1 | 0 | 0 | 0 | 1 | 2 |
| 0 | 0 | 1 | 0 | 0 | 0 | 0 | 0 | 1 | 2 |
| 0 | 0 | 0 | 0 | 0 | 0 | 0 | 1 | 4 | 3 |
| 0 | 0 | 0 | 0 | 0 | 0 | 0 | 1 | 1 | 2 |
| 0 | 0 | 1 | 0 | 0 | 0 | 0 | 0 | 1 | 2 |
| 0 | 0 | 1 | 0 | 0 | 0 | 0 | 0 | 3 | 2 |
| 1 | 1 | 0 | 0 | 0 | 0 | 0 | 0 | 1 | 2 |
| 0 | 0 | 0 | 0 | 0 | 0 | 0 | 1 | 1 | 3 |
| 0 | 0 | 0 | 0 | 0 | 0 | 1 | 0 | 3 | 2 |
| 0 | 0 | 0 | 0 | 0 | 0 | 0 | 0 | 1 | 2 |
| 0 | 0 | 1 | 0 | 0 | 0 | 0 | 0 | 2 | 3 |
| 0 | 0 | 1 | 0 | 0 | 0 | 0 | 0 | 1 | 2 |
| 0 | 0 | 1 | 0 | 0 | 0 | 0 | 0 | 3 | 1 |
| 1 | 0 | 0 | 0 | 0 | 0 | 0 | 0 | 1 | 2 |
| 0 | 0 | 1 | 0 | 0 | 0 | 0 | 0 | 1 | 2 |
| 0 | 0 | 1 | 0 | 0 | 0 | 0 | 0 | 1 | 3 |
| 0 | 0 | 0 | 0 | 0 | 0 | 0 | 1 | 1 | 2 |
| 0 | 0 | 1 | 0 | 0 | 0 | 0 | 0 | 3 | 2 |
| 0 | 0 | 1 | 0 | 0 | 0 | 0 | 0 | 1 | 2 |
| 1 | 0 | 0 | 0 | 0 | 0 | 0 | 0 | 1 | 2 |
| 0 | 1 | 1 | 0 | 0 | 1 | 0 | 0 | 1 | 2 |
| 1 | 0 | 0 | 0 | 0 | 0 | 0 | 0 | 1 | 2 |
| 0 | 1 | 0 | 0 | 0 | 0 | 0 | 0 | 2 | 2 |
| 0 | 0 | 0 | 0 | 1 | 0 | 0 | 0 | 1 | 3 |
| 0 | 0 | 1 | 0 | 0 | 0 | 0 | 0 | 1 | 3 |
| 0 | 0 | 0 | 0 | 0 | 0 | 0 | 0 | 1 | 2 |

|   |   |   |   |   |   |   |   |   |   |
|---|---|---|---|---|---|---|---|---|---|
| 1 | 1 | 1 | 0 | 0 | 0 | 0 | 0 | 1 | 2 |
| 0 | 0 | 0 | 0 | 1 | 0 | 0 | 0 | 1 | 3 |
| 0 | 0 | 0 | 0 | 1 | 0 | 0 | 0 | 2 | 2 |
| 0 | 0 | 0 | 0 | 0 | 0 | 0 | 0 | 1 | 3 |
| 1 | 0 | 1 | 0 | 0 | 0 | 0 | 0 | 1 | 2 |
| 0 | 0 | 1 | 0 | 1 | 0 | 0 | 0 | 1 | 2 |
| 0 | 1 | 1 | 0 | 1 | 0 | 0 | 0 | 1 | 2 |
| 0 | 0 | 0 | 0 | 0 | 0 | 0 | 1 | 1 | 2 |
| 0 | 0 | 1 | 0 | 0 | 0 | 0 | 0 | 1 | 2 |
| 0 | 0 | 0 | 0 | 1 | 0 | 0 | 0 | 1 | 2 |
| 1 | 0 | 0 | 0 | 0 | 0 | 0 | 0 | 1 | 2 |
| 0 | 0 | 0 | 0 | 0 | 0 | 0 | 1 | 1 | 2 |
| 1 | 1 | 0 | 0 | 0 | 0 | 0 | 0 | 1 | 3 |
| 0 | 0 | 0 | 0 | 0 | 0 | 0 | 1 | 4 | 3 |
| 1 | 0 | 1 | 0 | 0 | 0 | 0 | 0 | 1 | 2 |
| 1 | 0 | 1 | 0 | 0 | 0 | 0 | 0 | 1 | 3 |

| app_books | app_present | app_articles | app_pocs | app_metaan | app_guidelin | app_open_a | app_colleagi | app_scihub | app_abstract |
|-----------|-------------|--------------|----------|------------|--------------|------------|--------------|------------|--------------|
| 0         | 0           | 1            | 0        | 0          | 1            | 0          | 1            | 0          | 0            |
| 0         | 0           | 1            | 0        | 0          | 1            | 0          | 0            | 0          | 0            |
| 0         | 0           | 1            | 0        | 1          | 1            | 0          | 0            | 0          | 0            |
| 1         | 0           | 0            | 0        | 0          | 0            | 0          | 0            | 0          | 0            |
| 0         | 0           | 0            | 0        | 1          | 0            | 0          | 1            | 0          | 0            |
| 0         | 0           | 1            | 1        | 0          | 0            | 0          | 0            | 0          | 0            |
| 0         | 0           | 1            | 1        | 0          | 1            | 0          | 0            | 0          | 0            |
| 0         | 1           | 0            | 1        | 1          | 1            | 0          | 0            | 0          | 0            |
| 0         | 0           | 0            | 0        | 0          | 0            | 1          | 0            | 0          | 0            |
| 0         | 0           | 1            | 0        | 0          | 1            | 0          | 0            | 0          | 0            |
| 0         | 0           | 1            | 0        | 1          | 1            | 0          | 0            | 0          | 0            |
| 0         | 0           | 0            | 0        | 0          | 0            | 0          | 0            | 0          | 0            |
| 0         | 0           | 0            | 0        | 0          | 0            | 0          | 0            | 0          | 0            |
| 1         | 0           | 0            | 0        | 0          | 1            | 0          | 0            | 0          | 0            |
| 0         | 0           | 0            | 0        | 0          | 0            | 0          | 0            | 1          | 0            |
| 0         | 0           | 1            | 0        | 1          | 1            | 0          | 0            | 0          | 0            |
| 1         | 0           | 0            | 0        | 1          | 1            | 0          | 0            | 0          | 0            |
| 0         | 0           | 0            | 0        | 0          | 0            | 0          | 0            | 0          | 0            |
| 0         | 0           | 0            | 0        | 0          | 0            | 0          | 0            | 1          | 0            |
| 0         | 0           | 0            | 0        | 0          | 0            | 0          | 0            | 0          | 0            |
| 0         | 0           | 0            | 0        | 0          | 1            | 0          | 0            | 0          | 0            |
| 0         | 0           | 0            | 1        | 0          | 0            | 0          | 0            | 0          | 0            |
| 1         | 0           | 1            | 1        | 0          | 1            | 0          | 0            | 0          | 0            |
| 0         | 0           | 0            | 0        | 1          | 1            | 0          | 0            | 0          | 0            |
| 0         | 0           | 0            | 1        | 0          | 1            | 0          | 1            | 0          | 0            |
| 0         | 0           | 0            | 0        | 0          | 1            | 0          | 0            | 0          | 0            |
| 0         | 0           | 1            | 1        | 0          | 0            | 0          | 0            | 0          | 0            |
| 0         | 0           | 1            | 0        | 1          | 1            | 0          | 0            | 0          | 0            |
| 0         | 0           | 1            | 1        | 0          | 1            | 0          | 0            | 0          | 0            |
| 0         | 0           | 1            | 1        | 0          | 1            | 0          | 0            | 0          | 0            |
| 1         | 0           | 0            | 0        | 0          | 0            | 0          | 0            | 0          | 0            |

|   |   |   |   |   |   |   |   |   |   |
|---|---|---|---|---|---|---|---|---|---|
| 0 | 0 | 0 | 1 | 0 | 0 | 0 | 0 | 0 | 0 |
| 0 | 0 | 1 | 1 | 0 | 0 | 0 | 0 | 0 | 0 |
| 0 | 0 | 0 | 0 | 0 | 0 | 0 | 1 | 0 | 0 |
| 0 | 0 | 0 | 0 | 0 | 0 | 0 | 0 | 1 | 0 |
| 0 | 0 | 0 | 0 | 0 | 0 | 0 | 0 | 0 | 0 |
| 1 | 0 | 1 | 0 | 0 | 0 | 0 | 0 | 0 | 0 |
| 0 | 0 | 0 | 1 | 1 | 1 | 0 | 0 | 1 | 0 |
| 0 | 1 | 0 | 1 | 0 | 0 | 0 | 0 | 0 | 0 |
| 0 | 0 | 1 | 0 | 0 | 1 | 0 | 0 | 0 | 0 |
| 0 | 0 | 0 | 0 | 0 | 0 | 0 | 0 | 0 | 0 |
| 1 | 0 | 0 | 0 | 0 | 0 | 0 | 1 | 0 | 0 |
| 0 | 0 | 1 | 0 | 0 | 0 | 0 | 0 | 0 | 0 |
| 1 | 1 | 1 | 1 | 0 | 1 | 0 | 0 | 0 | 1 |
| 0 | 0 | 1 | 0 | 0 | 0 | 0 | 0 | 0 | 0 |
| 0 | 0 | 0 | 0 | 0 | 0 | 0 | 0 | 0 | 0 |
| 0 | 0 | 0 | 0 | 0 | 0 | 0 | 1 | 0 | 0 |
| 0 | 0 | 0 | 0 | 1 | 0 | 0 | 0 | 0 | 0 |
| 0 | 0 | 0 | 0 | 0 | 0 | 0 | 0 | 0 | 0 |
| 0 | 0 | 0 | 0 | 1 | 0 | 0 | 0 | 0 | 0 |
| 0 | 0 | 0 | 0 | 1 | 0 | 0 | 0 | 0 | 0 |
| 1 | 0 | 1 | 0 | 0 | 1 | 0 | 0 | 0 | 0 |
| 0 | 0 | 1 | 0 | 1 | 1 | 0 | 0 | 0 | 0 |
| 0 | 0 | 1 | 0 | 1 | 1 | 0 | 0 | 0 | 0 |
| 1 | 0 | 1 | 0 | 0 | 1 | 0 | 0 | 0 | 0 |
| 0 | 0 | 0 | 1 | 0 | 1 | 0 | 0 | 0 | 0 |
| 0 | 0 | 0 | 0 | 0 | 1 | 0 | 0 | 0 | 0 |
| 0 | 0 | 1 | 0 | 1 | 1 | 0 | 0 | 0 | 0 |
| 0 | 0 | 0 | 0 | 1 | 1 | 0 | 0 | 0 | 0 |
| 0 | 0 | 0 | 0 | 0 | 0 | 0 | 0 | 0 | 0 |
| 1 | 0 | 0 | 0 | 0 | 0 | 0 | 0 | 0 | 0 |
| 0 | 0 | 0 | 1 | 0 | 1 | 0 | 1 | 0 | 1 |

|   |   |   |   |   |   |   |   |   |   |
|---|---|---|---|---|---|---|---|---|---|
| 0 | 0 | 0 | 0 | 0 | 0 | 0 | 0 | 0 | 0 |
| 0 | 0 | 0 | 0 | 0 | 1 | 0 | 0 | 0 | 0 |
| 0 | 0 | 0 | 1 | 0 | 0 | 0 | 0 | 0 | 0 |
| 0 | 1 | 0 | 0 | 1 | 1 | 0 | 0 | 0 | 0 |
| 0 | 0 | 0 | 0 | 0 | 1 | 0 | 0 | 0 | 0 |
| 1 | 0 | 1 | 0 | 0 | 1 | 0 | 0 | 0 | 0 |
| 0 | 0 | 1 | 0 | 1 | 1 | 0 | 0 | 0 | 0 |
| 0 | 0 | 0 | 0 | 0 | 0 | 0 | 0 | 0 | 0 |
| 0 | 0 | 0 | 0 | 0 | 0 | 0 | 0 | 0 | 0 |
| 1 | 0 | 1 | 0 | 0 | 0 | 0 | 0 | 0 | 1 |
| 0 | 0 | 0 | 0 | 0 | 1 | 0 | 0 | 0 | 0 |
| 1 | 1 | 1 | 1 | 1 | 0 | 0 | 0 | 0 | 0 |
| 0 | 0 | 0 | 0 | 0 | 0 | 0 | 0 | 0 | 0 |
| 1 | 1 | 0 | 0 | 0 | 0 | 0 | 0 | 1 | 0 |
| 0 | 0 | 0 | 0 | 0 | 1 | 0 | 0 | 0 | 0 |
| 0 | 1 | 0 | 0 | 0 | 1 | 0 | 0 | 0 | 0 |
| 0 | 0 | 0 | 0 | 0 | 1 | 0 | 0 | 0 | 0 |
| 1 | 0 | 1 | 1 | 0 | 1 | 0 | 1 | 0 | 1 |
| 1 | 0 | 1 | 0 | 0 | 1 | 0 | 0 | 0 | 0 |
| 0 | 0 | 1 | 0 | 0 | 0 | 0 | 0 | 0 | 0 |
| 0 | 0 | 1 | 1 | 1 | 0 | 0 | 1 | 0 | 0 |
| 0 | 0 | 0 | 0 | 0 | 0 | 0 | 0 | 0 | 0 |
| 0 | 0 | 0 | 0 | 0 | 0 | 0 | 1 | 0 | 0 |
| 0 | 0 | 1 | 0 | 1 | 1 | 0 | 0 | 0 | 0 |
| 0 | 0 | 0 | 1 | 0 | 1 | 0 | 0 | 0 | 0 |
| 0 | 0 | 1 | 1 | 1 | 0 | 0 | 0 | 0 | 0 |
| 0 | 0 | 0 | 1 | 0 | 0 | 0 | 0 | 0 | 0 |
| 0 | 0 | 0 | 0 | 1 | 0 | 0 | 0 | 0 | 0 |
| 0 | 0 | 0 | 0 | 1 | 0 | 0 | 0 | 0 | 0 |
| 0 | 0 | 0 | 1 | 0 | 1 | 0 | 0 | 0 | 0 |
| 0 | 0 | 0 | 0 | 0 | 1 | 0 | 0 | 0 | 0 |
| 1 | 1 | 0 | 1 | 0 | 0 | 0 | 0 | 0 | 0 |

|   |   |   |   |   |   |   |   |   |   |
|---|---|---|---|---|---|---|---|---|---|
| 0 | 0 | 0 | 1 | 1 | 1 | 0 | 0 | 0 | 0 |
| 1 | 0 | 0 | 0 | 0 | 0 | 1 | 1 | 0 | 0 |
| 0 | 0 | 0 | 1 | 0 | 0 | 0 | 0 | 0 | 0 |
| 0 | 0 | 1 | 0 | 0 | 0 | 0 | 0 | 0 | 0 |
| 0 | 0 | 1 | 1 | 0 | 1 | 0 | 0 | 0 | 0 |
| 1 | 0 | 0 | 0 | 0 | 0 | 0 | 1 | 0 | 0 |
| 0 | 1 | 1 | 0 | 1 | 1 | 0 | 0 | 0 | 0 |
| 0 | 0 | 0 | 0 | 0 | 0 | 0 | 0 | 0 | 0 |
| 1 | 0 | 0 | 0 | 1 | 0 | 0 | 0 | 0 | 0 |
| 1 | 0 | 1 | 0 | 0 | 0 | 0 | 0 | 0 | 0 |
| 0 | 0 | 0 | 1 | 0 | 0 | 0 | 0 | 0 | 0 |
| 0 | 0 | 0 | 0 | 0 | 0 | 0 | 0 | 0 | 0 |
| 1 | 0 | 0 | 1 | 0 | 0 | 0 | 0 | 0 | 0 |
| 0 | 0 | 0 | 0 | 0 | 0 | 0 | 0 | 0 | 0 |
| 0 | 0 | 0 | 1 | 1 | 1 | 0 | 0 | 0 | 0 |
| 0 | 0 | 1 | 0 | 0 | 0 | 0 | 0 | 0 | 0 |



| <b>app_other</b> | <b>resource_eff</b> | <b>learning_ebr</b> | <b>further_interest</b> |
|------------------|---------------------|---------------------|-------------------------|
| 0                | 1                   | 1                   | 1                       |
| 0                | 1                   | 1                   | 2                       |
| 1                | 1                   | 1                   | 1                       |
| 0                | 2                   | 2                   | 2                       |
| 0                | 2                   | 2                   | 2                       |
| 0                | 1                   | 1                   | 1                       |
| 0                | 1                   | 1                   | 1                       |
| 0                | 1                   | 3                   | 3                       |
| 0                | 2                   | 1                   | 1                       |
| 0                | 1                   | 1                   | 1                       |
| 0                | 1                   | 1                   | 3                       |
| 1                | 1                   | 1                   | 1                       |
| 1                | 2                   | 2                   | 2                       |
| 0                | 1                   | 1                   | 2                       |
| 0                | 2                   | 2                   | 2                       |
| 0                | 3                   | 1                   | 3                       |
| 0                | 2                   | 2                   | 2                       |
| 1                | 1                   | 2                   | 2                       |
| 0                | 2                   | 4                   | 4                       |
| 1                | 3                   | 1                   | 1                       |
| 0                | 2                   | 1                   | 1                       |
| 0                | 1                   | 2                   | 1                       |
| 0                | 1                   | 2                   | 2                       |
| 0                | 1                   | 1                   | 2                       |
| 0                | 1                   | 2                   | 2                       |
| 0                | 2                   | 1                   | 1                       |
| 0                | 1                   | 1                   | 1                       |
| 0                | 2                   | 2                   | 2                       |
| 0                | 1                   | 1                   | 1                       |
| 0                | 1                   | 1                   | 1                       |

|   |   |   |   |
|---|---|---|---|
| 0 | 1 | 1 | 1 |
| 0 | 1 | 1 | 1 |
| 0 | 1 | 1 | 1 |
| 0 | 4 | 1 | 2 |
| 1 | 3 | 1 | 1 |
| 0 | 3 | 1 | 1 |
| 0 | 2 | 1 | 2 |
| 0 | 2 | 1 | 1 |
| 0 | 2 | 1 | 2 |
| 0 | 2 | 1 | 2 |
| 0 | 2 | 1 | 1 |
| 0 | 3 | 1 | 1 |
| 0 | 1 | 1 | 1 |
| 0 | 1 | 1 | 1 |
| 1 | 2 | 5 | 5 |
| 0 | 3 | 1 | 1 |
| 0 | 1 | 1 | 1 |
| 1 | 1 | 5 | 1 |
| 0 | 2 | 1 | 1 |
| 0 | 3 | 1 | 1 |
| 0 | 2 | 1 | 1 |
| 0 | 1 | 1 | 3 |
| 0 | 1 | 1 | 1 |
| 0 | 2 | 1 | 1 |
| 0 | 1 | 1 | 1 |
| 0 | 2 | 1 | 2 |
| 0 | 1 | 1 | 1 |
| 0 | 2 | 1 | 1 |
| 1 | 3 | 5 | 5 |
| 1 | 2 | 3 | 1 |
| 0 | 2 | 1 | 1 |

|   |   |   |   |
|---|---|---|---|
| 0 | 2 | 1 | 1 |
| 0 | 3 | 2 | 2 |
| 0 | 3 | 1 | 1 |
| 0 | 1 | 1 | 1 |
| 0 | 2 | 1 | 1 |
| 0 | 3 | 2 | 1 |
| 0 | 1 | 1 | 2 |
| 1 | 3 | 2 | 2 |
| 1 | 3 | 2 | 1 |
| 0 | 3 | 1 | 1 |
| 0 | 3 | 1 | 1 |
| 0 | 1 | 1 | 1 |
| 1 | 1 | 1 | 1 |
| 0 | 2 | 1 | 1 |
| 0 | 1 | 1 | 1 |
| 0 | 1 | 1 | 1 |
| 0 | 2 | 1 | 1 |
| 0 | 2 | 1 | 1 |
| 0 | 2 | 1 | 1 |
| 0 | 2 | 2 | 2 |
| 0 | 1 | 1 | 1 |
| 1 | 1 | 1 | 2 |
| 0 | 3 | 1 | 1 |
| 0 | 3 | 1 | 1 |
| 0 | 1 | 1 | 1 |
| 0 | 3 | 1 | 1 |
| 0 | 3 | 1 | 1 |
| 0 | 3 | 1 | 1 |
| 0 | 3 | 1 | 1 |
| 0 | 2 | 2 | 2 |
| 0 | 2 | 1 | 1 |
| 0 | 3 | 1 | 1 |

|   |   |   |   |
|---|---|---|---|
| 0 | 1 | 1 | 1 |
| 0 | 3 | 1 | 1 |
| 0 | 2 | 2 | 1 |
| 0 | 2 | 1 | 1 |
| 0 | 2 | 1 | 1 |
| 0 | 1 | 1 | 1 |
| 0 | 1 | 1 | 1 |
| 1 | 1 | 2 | 5 |
| 0 | 2 | 1 | 1 |
| 0 | 2 | 1 | 1 |
| 0 | 1 | 2 | 2 |
| 1 | 2 | 2 | 2 |
| 0 | 2 | 2 | 2 |
| 1 | 2 | 2 | 2 |
| 0 | 1 | 2 | 3 |
| 0 | 2 | 1 | 1 |
