# Supplementary material for: Barriers and facilitators to answering clinical questions in the Americas: a cross-sectional study of surgical trauma care providers
Source: HighWire-hosted journal article supplement (doi:10.1136/tsaco-2021-000774), 2021-10-01
Supplement: tsaco-2021-000774supp002_data_supplement.pdf [file tsaco-2021-000774supp002_data_supplement.pdf]

| Name                             | Question:                                                                          | Code |
|----------------------------------|------------------------------------------------------------------------------------|------|
| record_id                        |                                                                                    |      |
| evidence_based_surgery_timestamp |                                                                                    |      |
| language                         |                                                                                    | 1    |
|                                  |                                                                                    | 2    |
|                                  |                                                                                    | 3    |
| country                          | In which country do you work?                                                      | 1    |
|                                  |                                                                                    | 2    |
|                                  |                                                                                    | 3    |
|                                  |                                                                                    | 4    |
|                                  |                                                                                    | 5    |
|                                  |                                                                                    | 6    |
|                                  |                                                                                    | 7    |
|                                  |                                                                                    | 8    |
|                                  |                                                                                    | 9    |
|                                  |                                                                                    | 10   |
|                                  |                                                                                    | 11   |
|                                  |                                                                                    | 12   |
|                                  |                                                                                    | 13   |
|                                  |                                                                                    | 14   |
|                                  |                                                                                    | 15   |
|                                  |                                                                                    | 16   |
|                                  |                                                                                    | 17   |
|                                  |                                                                                    | 18   |
|                                  |                                                                                    | 19   |
|                                  |                                                                                    | 20   |
|                                  |                                                                                    | 21   |
| zone                             | Where is that hospital located?                                                    | 1    |
|                                  |                                                                                    | 2    |
|                                  |                                                                                    | 3    |
| hospital_type                    | What type of hospital is it?                                                       | 1    |
|                                  |                                                                                    | 2    |
|                                  |                                                                                    | 3    |
| number_patients                  | At that hospital, how many patients do you provide care for every week on average? | 1    |
|                                  |                                                                                    | 2    |
|                                  |                                                                                    | 3    |
|                                  |                                                                                    | 4    |
| beds                             | How many beds does your hospital have?                                             | 1    |
|                                  |                                                                                    | 2    |
|                                  |                                                                                    | 3    |
|                                  |                                                                                    | 4    |

|                        |                                                                                                                                    |   |
|------------------------|------------------------------------------------------------------------------------------------------------------------------------|---|
|                        |                                                                                                                                    | 5 |
| service                | In which department do you mainly work?                                                                                            | 1 |
|                        |                                                                                                                                    | 2 |
|                        |                                                                                                                                    | 3 |
| age                    | How old are you?                                                                                                                   | 1 |
|                        |                                                                                                                                    | 2 |
|                        |                                                                                                                                    | 3 |
|                        |                                                                                                                                    | 4 |
| years_practice         | How many years have you practiced medicine/surgery?                                                                                | 1 |
|                        |                                                                                                                                    | 2 |
|                        |                                                                                                                                    | 3 |
|                        |                                                                                                                                    | 4 |
|                        |                                                                                                                                    | 5 |
| english                | What is your level of English reading comprehension?                                                                               | 1 |
|                        |                                                                                                                                    | 2 |
|                        |                                                                                                                                    | 3 |
|                        |                                                                                                                                    | 4 |
|                        |                                                                                                                                    | 5 |
| eng_neg_impact         | My level of English fluency negatively impacts my ability to successfully search for and find answers to clinical questions online | 1 |
|                        |                                                                                                                                    | 2 |
|                        |                                                                                                                                    | 3 |
|                        |                                                                                                                                    | 4 |
|                        |                                                                                                                                    | 5 |
| google_trans           | How do you translate information to answer your clinical questions when needed?<br>Did you check "Google translator" ?             | 0 |
|                        |                                                                                                                                    | 1 |
| understand_lang        | Did you check "All the information I need is in a language I understand" ?                                                         | 0 |
|                        |                                                                                                                                    | 1 |
| colleagues_help        | Did you check "Colleagues help me" ?                                                                                               | 0 |
|                        |                                                                                                                                    | 1 |
| unnecessary            | Did you check "I do not need to translate the important information" ?                                                             | 0 |
|                        |                                                                                                                                    | 1 |
| translate_other        | Did you check "Other (specify)" ?                                                                                                  | 0 |
|                        |                                                                                                                                    | 1 |
| translation_tool_other |                                                                                                                                    |   |

|                     |                                                                                                                                                                                    |   |
|---------------------|------------------------------------------------------------------------------------------------------------------------------------------------------------------------------------|---|
| translation_quality | My access to and quality of translation for medical information is sufficient for clinical use                                                                                     | 1 |
|                     |                                                                                                                                                                                    | 2 |
|                     |                                                                                                                                                                                    | 3 |
|                     |                                                                                                                                                                                    | 4 |
|                     |                                                                                                                                                                                    | 5 |
| doubts              | How often do you have uncertainty regarding any particular aspect of clinical care? (i.e: dosing)                                                                                  | 1 |
|                     |                                                                                                                                                                                    | 2 |
|                     |                                                                                                                                                                                    | 3 |
|                     |                                                                                                                                                                                    | 4 |
|                     |                                                                                                                                                                                    | 5 |
| clinical_answers    | How frequently do you have a clinical question that you cannot answer using online or in-person resources?                                                                         | 1 |
|                     |                                                                                                                                                                                    | 2 |
|                     |                                                                                                                                                                                    | 3 |
|                     |                                                                                                                                                                                    | 4 |
|                     |                                                                                                                                                                                    | 5 |
| books               | When asked: Select the top 3 resources you most often use to adequately address your uncertainties in specific clinical care scenarios<br>Did you check "printed academic books" ? | 0 |
|                     |                                                                                                                                                                                    | 1 |
| presentations       | Did you check "Presentations" ?                                                                                                                                                    | 0 |
|                     |                                                                                                                                                                                    | 1 |
| articles            | Did you check "Full text peer-reviewed journal articles" ?                                                                                                                         | 0 |
|                     |                                                                                                                                                                                    | 1 |
| pocs                | Did you check "Clinical point of care summaries (i.e: UpToDate)" ?                                                                                                                 | 0 |
|                     |                                                                                                                                                                                    | 1 |
| metaanalyses        | Did you check "Meta-analyses (i.e: Cochrane review)" ?                                                                                                                             | 0 |
|                     |                                                                                                                                                                                    | 1 |
| guidelines          | Did you check "Guidelines (i.e: American College of Surgeons)" ?                                                                                                                   | 0 |
|                     |                                                                                                                                                                                    | 1 |
| open_access         | Did you check "Open access, not peer reviewed (i.e: Wikipedia)" ?                                                                                                                  | 0 |
|                     |                                                                                                                                                                                    | 1 |
| colleague           | Did you check "Colleague" ?                                                                                                                                                        | 0 |

|                      |                                                                                                                      |   |
|----------------------|----------------------------------------------------------------------------------------------------------------------|---|
|                      |                                                                                                                      | 1 |
| scihub               | Did you check "SciHub" ?                                                                                             | 0 |
|                      |                                                                                                                      | 1 |
| abstracts            | Did you check "Abstracts" ?                                                                                          | 0 |
|                      |                                                                                                                      | 1 |
| other                | Did you check "Other" ?                                                                                              | 0 |
|                      |                                                                                                                      | 1 |
| pay_walls            | How do you most often access printed medical literature                                                              | 1 |
|                      |                                                                                                                      | 2 |
|                      |                                                                                                                      | 3 |
|                      |                                                                                                                      | 4 |
|                      |                                                                                                                      | 5 |
|                      |                                                                                                                      | 6 |
| interpret_apply      | I feel confident in my ability to interpret and apply peer reviewed medical journal articles to my clinical practice | 1 |
|                      |                                                                                                                      | 2 |
|                      |                                                                                                                      | 3 |
|                      |                                                                                                                      | 4 |
|                      |                                                                                                                      | 5 |
| map                  | What is your target mean arterial blood pressure in patients with septic shock requiring vasopressors?               | 1 |
|                      |                                                                                                                      | 2 |
|                      |                                                                                                                      | 3 |
|                      |                                                                                                                      | 4 |
| vasopressors         | What would you use as your first-choice vasopressor for a patient in septic shock?                                   | 1 |
|                      |                                                                                                                      | 2 |
|                      |                                                                                                                      | 3 |
|                      |                                                                                                                      | 4 |
|                      |                                                                                                                      | 5 |
| hemoglobin           | Based on which hemoglobin concentration should you begin red blood?                                                  | 1 |
|                      |                                                                                                                      | 2 |
|                      |                                                                                                                      | 3 |
|                      |                                                                                                                      | 4 |
| sepsis_books         | What resources did you use to answer these clinical questions?<br>Did you check "printed academic books" ?           | 0 |
|                      |                                                                                                                      | 1 |
| sepsis_presentations | Did you check "Presentations" ?                                                                                      | 0 |

|                     |                                                                                                            |   |
|---------------------|------------------------------------------------------------------------------------------------------------|---|
|                     |                                                                                                            | 1 |
| sepsis_articles     | Did you check "Full text peer-reviewed journal articles" ?                                                 | 0 |
|                     |                                                                                                            | 1 |
| sepsis_pocs         | Did you check "Clinical point of care summaries (i.e: UpToDate)" ?                                         | 0 |
|                     |                                                                                                            | 1 |
| sepsis_metaanalyses | Did you check "Meta-analyses (i.e: Cochrane review)" ?                                                     | 0 |
|                     |                                                                                                            | 1 |
| sepsis_guidelines   | Did you check "Guidelines (i.e: American College of Surgeons)" ?                                           | 0 |
|                     |                                                                                                            | 1 |
| sepsis_open_access  | Did you check "Open access, not peer reviewed (i.e: Wikipedia)" ?                                          | 0 |
|                     |                                                                                                            | 1 |
| sepsis_colleague    | Did you check "Colleague" ?                                                                                | 0 |
|                     |                                                                                                            | 1 |
| sepsis_scihub       | Did you check "SciHub" ?                                                                                   | 0 |
|                     |                                                                                                            | 1 |
| sepsis_abstracts    | Did you check "Abstracts" ?                                                                                | 0 |
|                     |                                                                                                            | 1 |
| sepsis_other        | Did you check "Other" ?                                                                                    | 0 |
|                     |                                                                                                            | 1 |
| abx                 | For uncomplicated appendicitis, how long should you continue antibiotics after an appendectomy?            | 1 |
|                     |                                                                                                            | 2 |
|                     |                                                                                                            | 3 |
|                     |                                                                                                            | 4 |
| drain               | Should you provide a post-operative drain in appendicitis patients?                                        | 1 |
|                     |                                                                                                            | 2 |
|                     |                                                                                                            | 3 |
| app_books           | What resources did you use to answer these clinical questions?<br>Did you check "printed academic books" ? | 0 |
|                     |                                                                                                            | 1 |
| app_presentations   | Did you check "Presentations" ?                                                                            | 0 |
|                     |                                                                                                            | 1 |
| app_articles        | Did you check "Full text peer-reviewed journal articles" ?                                                 | 0 |

|                    |                                                                                               |   |
|--------------------|-----------------------------------------------------------------------------------------------|---|
|                    |                                                                                               | 1 |
| app_pocs           | Did you check "Clinical point of care summaries (i.e: UpToDate)" ?                            | 0 |
|                    |                                                                                               | 1 |
| app_metaanalyses   | Did you check "Meta-analyses (i.e: Cochrane review)" ?                                        | 0 |
|                    |                                                                                               | 1 |
| app_guidelines     | Did you check "Guidelines (i.e: American College of Surgeons)" ?                              | 0 |
|                    |                                                                                               | 1 |
| app_open_access    | Did you check "Open access, not peer reviewed (i.e: Wikipedia)" ?                             | 0 |
|                    |                                                                                               | 1 |
| app_colleague      | Did you check "Colleague" ?                                                                   | 0 |
|                    |                                                                                               | 1 |
| app_scihub         | Did you check "SciHub" ?                                                                      | 0 |
|                    |                                                                                               | 1 |
| app_abstracts      | Did you check "Abstracts" ?                                                                   | 0 |
|                    |                                                                                               | 1 |
| app_other          | Did you check "Other" ?                                                                       | 0 |
|                    |                                                                                               | 1 |
| score              | Knowledge score for clinical questions                                                        | 0 |
|                    |                                                                                               | 1 |
|                    |                                                                                               | 2 |
|                    |                                                                                               | 3 |
|                    |                                                                                               | 4 |
|                    |                                                                                               | 5 |
| resource_effective | I had adequate resources to answer these questions in this survey efficiently and effectively | 1 |
|                    |                                                                                               | 2 |
|                    |                                                                                               | 3 |
|                    |                                                                                               | 4 |
|                    |                                                                                               | 5 |
| learning_ebm       | I am interested in learning more about evaluating evidence to apply to my clinical practice   | 1 |
|                    |                                                                                               | 2 |
|                    |                                                                                               | 3 |
|                    |                                                                                               | 4 |
|                    |                                                                                               | 5 |
| further_interest   | I am interested in learning how to conduct my own research to answer my clinical questions    | 1 |
|                    |                                                                                               | 2 |

3

4

5

**Answer****Notes**

| <b>Answer</b>      | <b>Notes</b>               |
|--------------------|----------------------------|
|                    | time/date survey was taken |
| English            | 28 surveys                 |
| Spanish            | 77 surveys                 |
| Portuguese         | 6 surveys                  |
| Argentina          |                            |
| Bolivia            |                            |
| Brasil             |                            |
| Chile              |                            |
| Colombia           |                            |
| Costa Rica         |                            |
| Cuba               |                            |
| Dominican Republic |                            |
| Ecuador            |                            |
| Guatemala          |                            |
| Mexico             |                            |
| Nicaragua          |                            |
| Panama             |                            |
| Paraguay           |                            |
| Peru               |                            |
| Qatar              |                            |
| Spain              |                            |
| United Kingdom     |                            |
| United States      |                            |
| Uruguay            |                            |
| Venezuela          |                            |
| rural              |                            |
| suburban           |                            |
| urban              |                            |
| public             |                            |
| private            |                            |
| other              |                            |
| 0-50               |                            |
| 51-100             |                            |
| 101-150            |                            |
| >150               |                            |
| <50                |                            |
| 50-149             |                            |
| 150-300            |                            |
| >300               |                            |



I don't know  
general surgery  
emergency/trauma care  
ICU  
18-30  
31-45  
46-60  
>60

Student  
1-10 years  
11-20 years  
21-30 years  
>30 years

None  
Elementary  
Limited working proficiency  
Professional proficiency  
Native language

Strongly agree  
Agree  
Neutral  
Disagree  
Strongly disagree

No  
Yes

No  
Yes  
No  
Yes

No  
Yes  
No  
Yes  
write-in

Strongly agree  
Agree  
Neutral  
Disagree  
Strongly disagree

Multiple times a day  
At least daily  
At least weekly  
At least monthly  
Never

Multiple times a day  
At least daily  
At least weekly  
At least monthly  
Never

No  
Yes  
No  
Yes

No  
Yes

No  
Yes

No  
Yes

No  
Yes

No  
Yes  
No

Yes

No

Yes

No

Yes

No

Yes

I don't have access to priced medical literature

Shared subscriptions with colleagues

SciHub

Individually purchased

Institutionally purchased

Other (specify)

Strongly agree

Agree

Neutral

Disagree

Strongly disagree

55mmHg

60mmHg

65mmHg Correct answer

70mmHg

Dopamine

Norepinephrine Correct answer

Dobutamine

Vasopressin

Epinephrine

≤ 7 g/dl Correct answer

> 7-9 g/dl

10-12 g/dl

12-14 g/dl

No

Yes

No

Yes

No  
Yes

No  
Yes

No  
Yes

No  
Yes

No  
Yes

No  
Yes

No  
Yes

No  
Yes

No  
Yes

0-24 hours ??????????

4 days

7 days

There is not enough evidence to decide

Yes, it lowers the incidence of intra-abdominal abscess

No, it causes more complications and increases length of stay and recovery time Correct answer

There is not enough evidence to decide

No  
Yes

No  
Yes

No

Yes

No

Yes

No

Yes

No

Yes

No

Yes

No

Yes

No

Yes

No

Yes

No

Yes

Answered 0/5 correctly

Answered 1/5 correctly

Answered 2/5 correctly

Answered 3/5 correctly

Answered 4/5 correctly

Answered 5/5 correctly

Strongly agree

Agree

Neutral

Disagree

Strongly disagree

Strongly agree

Agree

Neutral

Disagree

Strongly disagree

Strongly agree

Agree

Neutral  
Disagree  
Strongly disagree
