# Supplementary material for: Barriers and facilitators to answering clinical questions in the Americas: a cross-sectional study of surgical trauma care providers
Source: HighWire-hosted journal article supplement (doi:10.1136/tsaco-2021-000774), 2021-10-01
Supplement: tsaco-2021-000774supp003_data_supplement.pdf [file tsaco-2021-000774supp003_data_supplement.pdf]

## Appendix A: English survey instrument

**In which country do you work?** (write in) \_\_\_\_\_

**In which hospital do you mainly work?** (write in) \_\_\_\_\_

**Where is that hospital located?**

☐ Rural ☐ Suburban ☐ Urban

**What type of hospital is it?** ☐ Public ☐ Private ☐ Other

**At that hospital, how many patients do you provide care for every week on average?**

☐ 0-50 ☐ 51-100 ☐ 101-150 ☐ >150

**How many beds does your hospital have?** (select 1)

☐ <50 ☐ 50-149 ☐ 150-300 ☐ >300 ☐ I don't know

**In which department do you mainly work?** (select 1)

☐ General surgery ☐ Emergency/trauma care ☐ ICU

☐ Other (specify): \_\_\_\_\_

**How old are you?** (select 1)

☐ 18-30 ☐ 31-45 ☐ 46-60 ☐ >60

**How many years have you practiced medicine/surgery?** (select 1)

☐ Student ☐ 1-10 ☐ 11-20 ☐ 21-30 ☐ >30

**1. What is your level of English reading comprehension?** (select 1)

☐ None ☐ Elementary ☐ Limited working proficiency

☐ Professional proficiency ☐ Native language

**2. My level of English fluency negatively impacts my ability to successfully search for and find answers to clinical questions online:** (select 1)

☐ Strongly agree ☐ Agree ☐ Neutral

☐ Disagree ☐ Strongly disagree

**3. How do you translate information to answer your clinical questions when needed?** (select multiple)

☐ Google Translator ☐ DeepL

☐ All the information I need is in a language I understand

☐ Colleagues help me

☐ I do not need to translate the important information

☐ Other (specify): \_\_\_\_\_

**4. My access to and quality of translation for medical information is sufficient for clinical use:** (select 1)

☐ Strongly agree ☐ Agree ☐ Neutral

☐ Disagree ☐ Strongly disagree

**5. How often do you have uncertainty regarding any particular aspect of clinical care (i.e: dosing)** (select 1)

☐ multiple times a day ☐ at least daily

☐ at least weekly ☐ at least monthly ☐ never

**6. How frequently do you have a clinical question that you cannot answer using online or in-person resources?** (select 1)

☐ multiple times a day ☐ at least daily

☐ at least weekly ☐ at least monthly ☐ never

**7. Select the top 3 resources you most often use to adequately address your uncertainties in specific clinical care scenarios:**

☐ Printed academic books ☐ Presentations

☐ Full text peer reviewed journal articles

☐ Clinical point of care summary (i.e: UpToDate)

☐ Meta-analyses (i.e: Cochrane review)

☐ Guidelines (ie: American College of Surgeons)

☐ Open access, not peer reviewed (i.e: Wikipedia)

☐ Colleague ☐ SciHub ☐ Abstracts ☐ Other (specify): \_\_\_\_\_

**8. How do you most often access priced medical literature:**

☐ I don't have access to priced medical literature

☐ Shared subscription with colleagues ☐ SciHub

☐ Individually purchased ☐ Institutionally purchased

☐ Other (specify): \_\_\_\_\_

**9. I feel confident in my ability to interpret and apply peer reviewed medical journal articles to my clinical practice:** (select 1)

☐ Strongly agree ☐ Agree ☐ Neutral

☐ Disagree ☐ Strongly disagree

**\*\* Answer the following questions using all the resources available to you** (for example: internet, journal subscriptions, medical information summaries, colleagues)

All clinical questions relate to patients with no other comorbidities, unless specifically stated in the question.

**10. Sepsis:**

**a. What is your target mean arterial blood pressure in patients with septic shock requiring vasopressors?** (select 1)

☐ 55 mm Hg ☐ 60 mmHg ☐ 65 mm Hg ☐ 70 mm Hg

**b. What would you use as your first-choice vasopressor for a patient in septic shock?** (select 1)

☐ Dopamine ☐ Norepinephrine ☐ Dobutamine

☐ Vasopressin ☐ Epinephrine

**c. Based on which hemoglobin concentration should you begin red blood cell transfusion?** (select 1)

☐ <7.0 g/dl ☐ >7-9 g/dl ☐ 10-12 g/dl ☐ 12-14 g/dl

**d. What resources did you use to answer these clinical questions?** (select all that apply)

☐ Printed academic books ☐ Presentations

☐ Full text peer reviewed journal articles

☐ Clinical point of care summary (i.e: UpToDate)

☐ Meta-analyses (i.e: Cochrane review)

☐ Guidelines (ie: American College of Surgeons)

☐ Open access, not peer reviewed (i.e: Wikipedia)

☐ Colleague ☐ SciHub ☐ Abstracts ☐ Other (specify): \_\_\_\_

**11. Appendicitis:**

**a. For uncomplicated appendicitis, how long should you continue antibiotics after an appendectomy?** (select 1)

☐ 0-24 hours ☐ 4 days ☐ 7 days ☐ There is not enough evidence to decide

**b. Should you provide a post-operative drain in appendicitis patients?** (select 1)

☐ Yes, it lowers the incidence of intra-abdominal abscess

☐ No, it causes more complications, and increases length of stay and recovery time

☐ There is not enough evidence to decide

**c. What resources did you use to answer these clinical questions?** (select all that apply)

☐ Printed academic books ☐ Presentations

☐ Full text peer reviewed journal articles

☐ Clinical point of care summary (i.e: UpToDate)

☐ Meta-analyses (i.e: Cochrane review)

☐ Guidelines (ie: American College of Surgeons)

☐ Open access, not peer reviewed (i.e: Wikipedia)

☐ Colleague ☐ SciHub ☐ Abstracts ☐ Other (specify): \_\_\_\_

**12. I had adequate resources to answer these questions in this survey efficiently and effectively:**

(select 1)

☐ Strongly agree ☐ Agree ☐ Neutral

☐ Disagree ☐ Strongly disagree

**13. I am interested in learning more about evaluating evidence to apply to my clinical practice:** (select 1)

☐ Strongly agree ☐ Agree ☐ Neutral

☐ Disagree ☐ Strongly disagree

**14. I am interested in learning how to conduct my own research to answer my clinical questions:**

(select 1)

☐ Strongly agree ☐ Agree ☐ Neutral

☐ Disagree ☐ Strongly disagree
